# Supplementary material
Source: PubMed Central journal article supplement (PMC2670667)
Supplement: 90520.2008_4.pdf [file 90520.2008_4.pdf]

**Suppl. Table 1.** Primer sequences used to generate Northern probes.

| <u>Gene</u>    | <u>Primer Sequence</u>                   |                                                       |
|----------------|------------------------------------------|-------------------------------------------------------|
| L32            | L32 5':<br>L32 3':                       | CATCTGTTTTACGGCATCATG<br>CGCTCCCATAACCGATGTTGG        |
| Cyp3a11        | Cyp3a11 5':<br>Cyp3a11 3':               | GAAAAAACTGCAGGATGAGATCG<br>CCGTGGCACAACCTTTAGAAC      |
| Cyp4v3         | Cyp4v3 5'<br>Cyp4v3 3'                   | GCGCAAGGCTTTCCTTGACTTG<br>CTCCATGACAGCAAACCTTTGAC     |
| GST $\alpha$ 4 | GST $\alpha$ 4 5':<br>GST $\alpha$ 4 3': | GACCTGCAGGACGGTGAAC TTTCG<br>GTTGCCAACGAGAAAAGCCTCTC  |
| GSTk1          | GSTk1 5':<br>GSTk1 3':                   | GAGAAGATCTCCACACAACAGGTG<br>CATCAACTTTATTTTATGGGAATGC |
