# Supplementary material
Source: PubMed Central journal article supplement (PMC2670667)

Suppl. Fig. 1  
Bradford et al

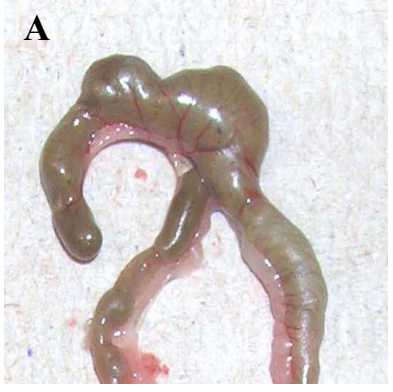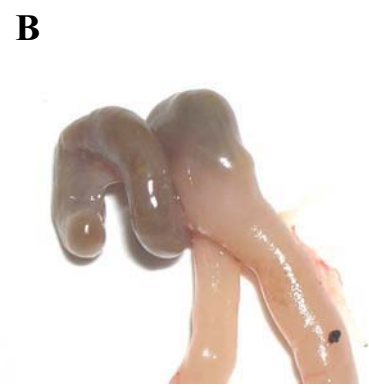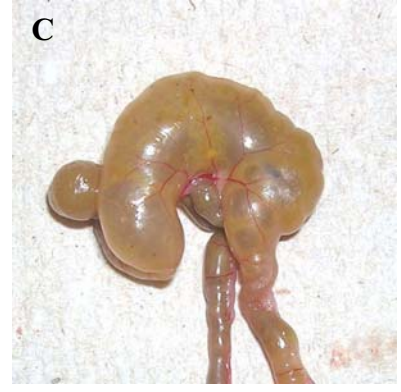

Supplement: 90520.2008_1.pdf [file 90520.2008_1.pdf]

Suppl. Fig. 2  
Bradford et al

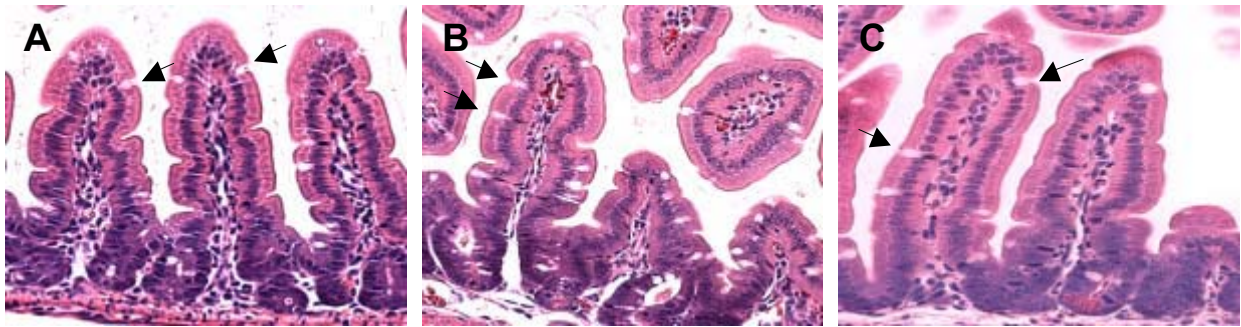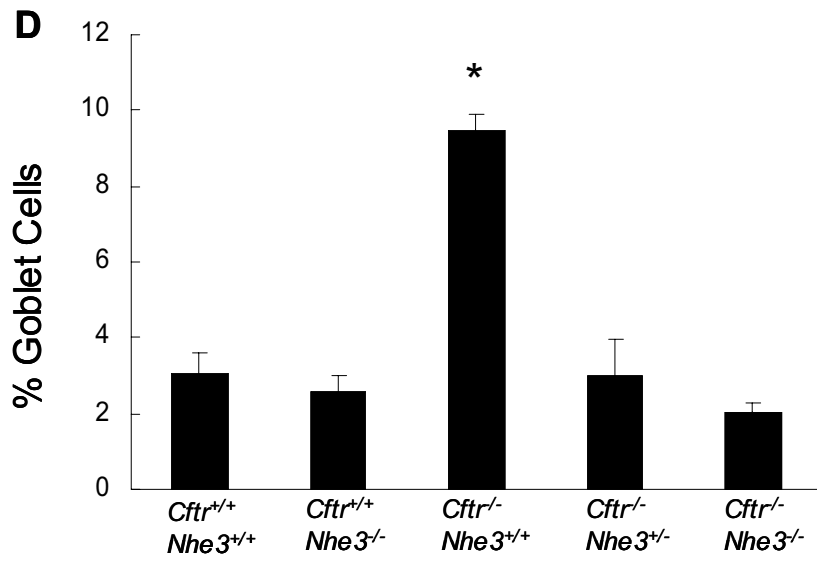

Supplement: 90520.2008_2.pdf [file 90520.2008_2.pdf]
